P3852

## Twenty-eight-year temporal trends of treatment strategy and short-term outcomes in patients with high-risk pulmonary embolism: impact of ESC guidelines changes

Y. Hosokawa<sup>1</sup>, T. Yamamoto<sup>1</sup>, A. Tanida<sup>1</sup>, J. Matsuda<sup>1</sup>, H. Sangen<sup>1</sup>, J. Nakata<sup>1</sup>, S. Tara<sup>1</sup>, W. Shimizu<sup>2</sup><sup>1</sup>Nippon Medical School Hospital, Cardiac and Intensive Care Unit, Tokyo, Japan; <sup>2</sup>Nippon Medical School, Department of Cardiology, Tokyo, Japan

**Background:** Thrombolysis has been recommended for high-risk pulmonary embolism (PE) in ESC guidelines, used as a reference in Japan. Recently, indication of thrombolysis for acute PE has been limited with recent guideline revision. Little is known regarding trends of treatment strategy and mortality in high-risk PE patients.

**Purpose:** To clarify temporal trends of treatment strategy and short-term outcomes in high-risk PE patients.

**Methods:** A retrospective analysis of therapeutic interventions and short-term outcomes was performed for 52 consecutive high-risk PE patients including cardiac arrest. According to timing of ESC guidelines update (2000, 2008 and 2014), patients were divided into four time periods: 1992 to 2000, 2001 to 2008, 2009 to 2014, and 2015 to 2018.

**Results:** Mean age and proportion of male were not different over the pe-

riod. Nosocomial case decreased from 100% to 25% ( $p < 0.01$ ). Postoperative cases (relative contraindication for thrombolysis) included 43% of all patients. Cardiac arrest and VA-ECMO use were 42% and 21% of all patients. Any thrombolytic therapy including catheter-directed intervention showed a non-significant decrease trend (92%-87%-71%-44%,  $p = 0.067$ ). Temporary or retrieval IVC filter insertion showed a significant downward trend (36%-80%-54%-22%,  $p = 0.025$ ). The entire study 30-day mortality was 23%. There was no significant difference in 30-day mortality over the periods (14%-27%-14%-44%,  $p = 0.303$ ). However, major bleeding decreased significantly (71%-40%-7%-22%,  $p = 0.004$ ) (Table).

**Conclusion:** The temporal analysis identified a decreased trend in any thrombolytic therapy and IVC filter insertion in high-risk PE. The study also found a decreasing trend in major bleeding.

Table 1

|                                | 1992–2000 (n=14) | 2001–2008 (n=15) | 2009–2014 (n=14) | 2015–2018 (n=9) | p     |
|--------------------------------|------------------|------------------|------------------|-----------------|-------|
| Age (years)                    | 54±12            | 59±17            | 64±13            | 65±16           | 0.224 |
| Male                           | 29%              | 13%              | 29%              | 44%             | 0.269 |
| Any thrombolytic therapy       | 92%              | 87%              | 71%              | 44%             | 0.067 |
| Catheter-directed therapy      | 86%              | 87%              | 71%              | 0%              | <0.01 |
| with thrombolytics             | (92%)            | (83%)            | (90%)            |                 |       |
| without thrombolytics          | (8%)             | (17%)            | (10%)            |                 |       |
| Only intravenous thrombolysis  | 8%               | 7%               | 7%               | 44%             | 0.038 |
| Temporary/retrieval IVC filter | 36%              | 80%              | 54%              | 22%             | 0.025 |
| ICU stay (days)                | 15±14            | 10±18            | 5±4              | 8±8             | 0.206 |
| 30-day mortality               | 14%              | 27%              | 14%              | 44%             | 0.303 |
| Major bleeding                 | 71%              | 40%              | 7%               | 22%             | 0.004 |
